# Supplementary material for: Analysis of Fuel Alternative Products Obtained by the Pyrolysis of Diverse Types of Plastic Materials Isolated from a Dumpsite Origin in Pakistan
Source: Polymers (Basel). 2022 Dec 21;15(1):24. doi: 10.3390/polym15010024 (PMC9823855; doi:10.3390/polym15010024)
Supplement: Supplementary file 1 [file polymers-15-00024-s001.zip › polymers-2052689-supplementary.pdf]

# Analysis of fuel alternative products obtained by the pyrolysis of diverse types of plastic materials isolated from a dumpsite origin in Pakistan

Nuzhat Javed <sup>1</sup>, Sana Muhammad <sup>1</sup>, Shazia Iram <sup>1,\*</sup>, Muhammad Wajahat Ramay <sup>1,2</sup>, Shaan Bibi Jaffri <sup>1</sup>, Mariem Damak <sup>2</sup>, György Fekete <sup>2</sup>, Zsolt Varga <sup>2</sup>, András Székács <sup>2</sup> and László Aleksza <sup>2,3,\*</sup>

<sup>1</sup> Department of Environmental Sciences, Fatima Jinnah Women University, The Mall, Rawalpindi, 46000, Pakistan

<sup>2</sup> Institute of Environmental Sciences, Hungarian University of Agriculture and Life Sciences, Páter Károly u. 1, H-2100 Gödöllő, Hungary

<sup>3</sup> Profikomp Environmental Technologies Inc., Kühne Ede u. 7, H-2100 Gödöllő, Hungary

\* Correspondence: shaizairam@fjwu.edu.pk (S.I.); aleksza.laszlo@uni-mate.hu (L.A.); Tel.: +92-51-9292900-(2083) (S.I.); +36-28-512-490 (L.A.)

## Supplementary Materials

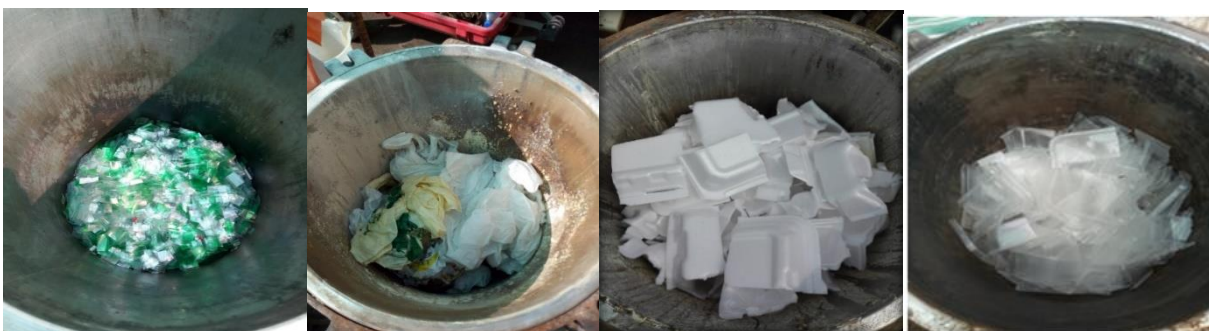

Figure S1. Feedstocks from dumpsites in the study.

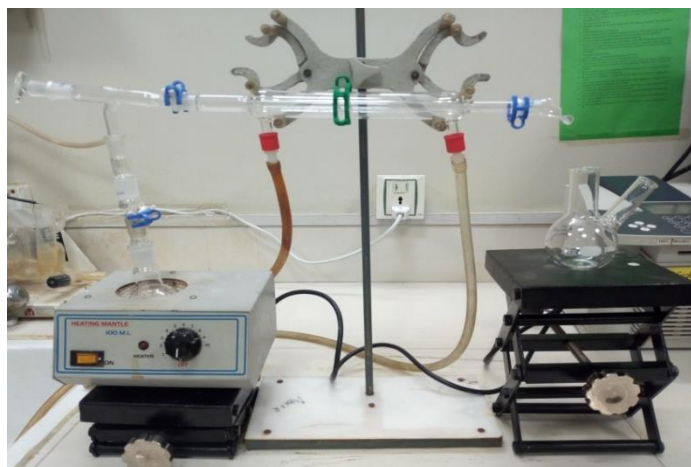

Figure S2. Preliminary pilot study setup.

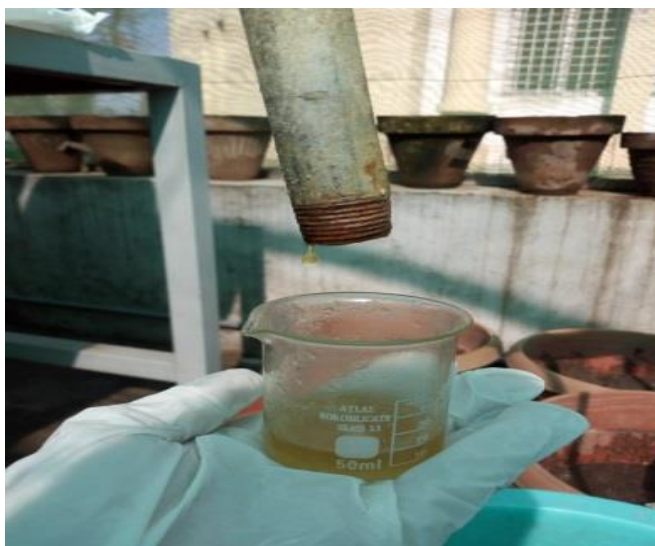

**Figure S3.** Pyrolysis fuel emerging from the reactor.

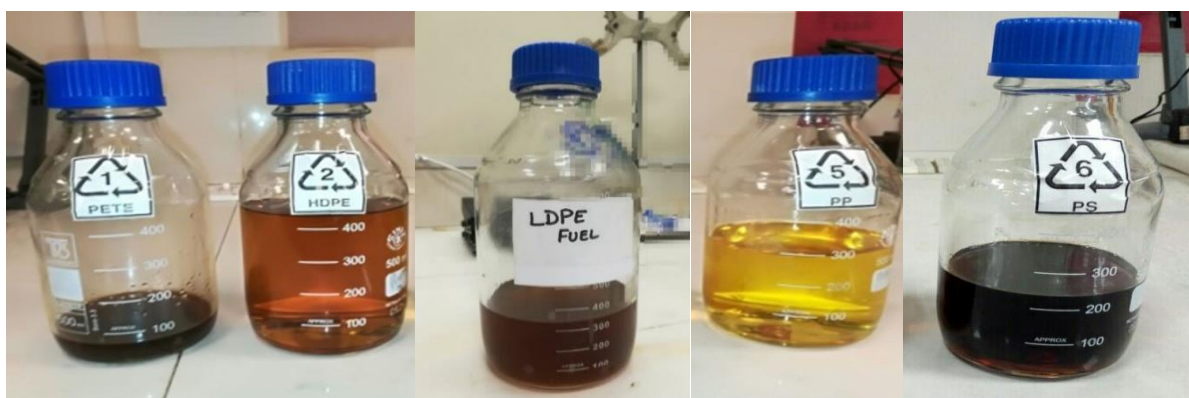

**Figure S4.** Pyrolysis fuels produced from the reactor.

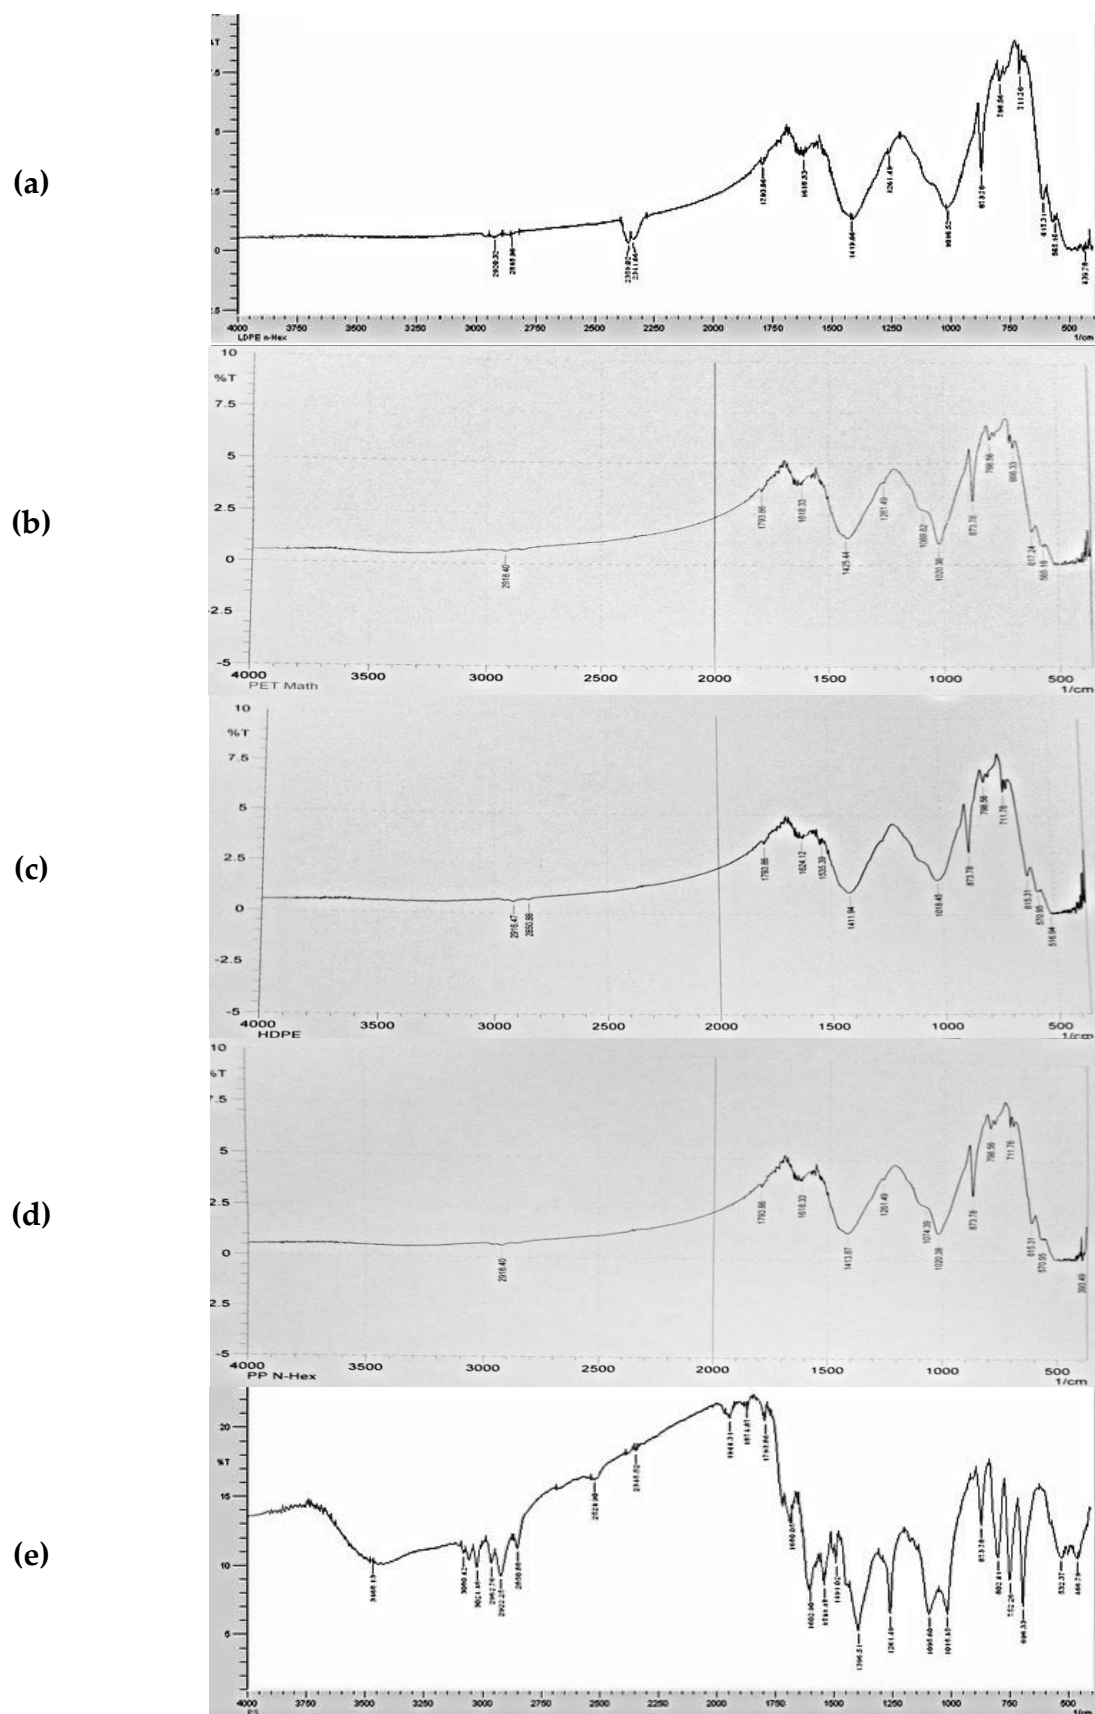

**Figure S5.** FT-IR spectra of plastic-derived fuels by plastic type. (a) PET-derived fuel; (b) HDPE-derived fuel; (c) LDPE-derived fuel; (d) PP-derived fuel; (e) PS-derived fuel.

**(a)**

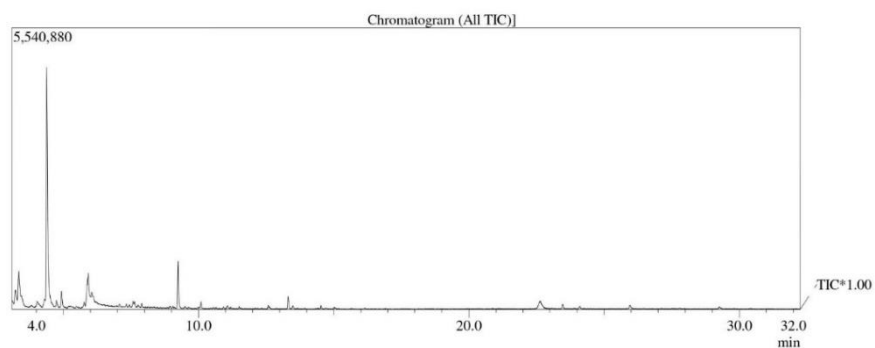

**(b)**

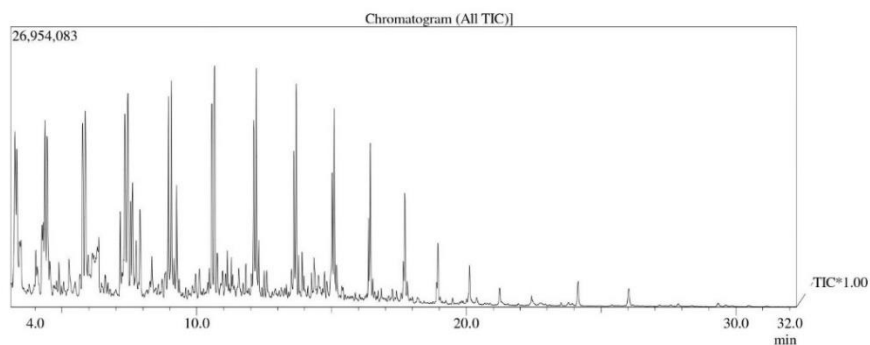

**(c)**

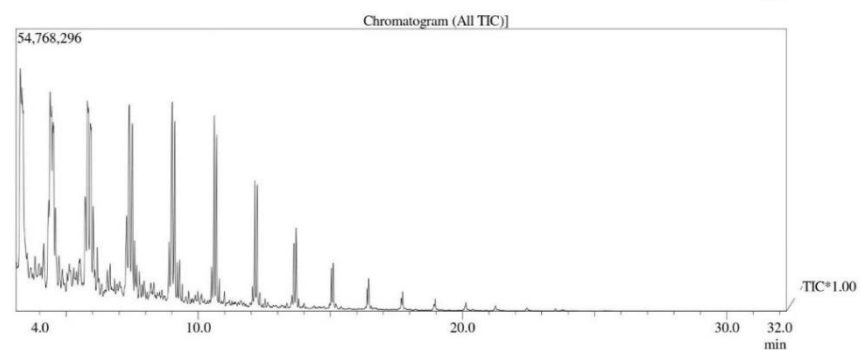

**(d)**

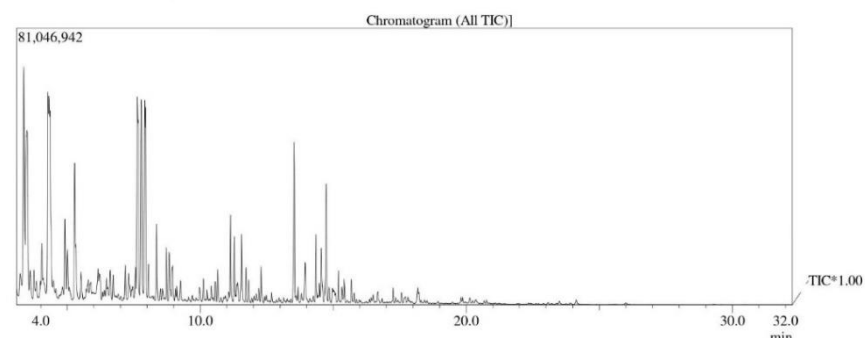

**(e)**

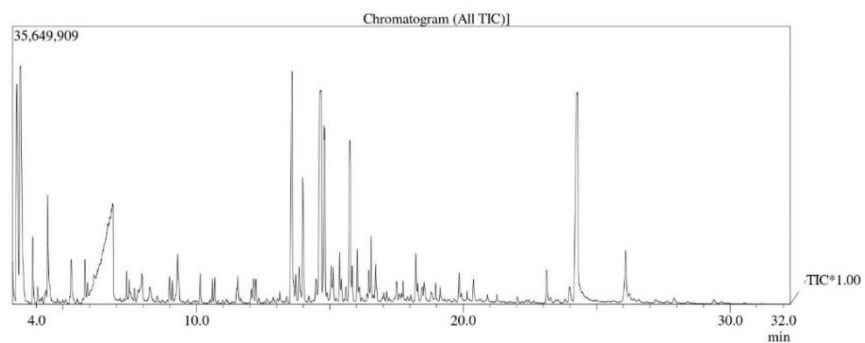

**Figure S6.** GC-MS spectra of plastic-derived fuels by plastic type. **(a)** PET-derived fuel; **(b)** HDPE-derived fuel; **(c)** LDPE-derived fuel; **(d)** PP-derived fuel; **(e)** PS-derived fuel.
